# Supplementary material for: High-temperature synthesis of ordered mesoporous silicas from solo hydrocarbonsurfactants and understanding of their synthetic mechanisms
Source: Royal Society of Chemistry journal article supplement (doi:10.1039/b817616g), 2008-12-15
Supplement: b817616g.pdf [file b817616g.pdf]

## Supporting Figures

Figure 1S (A) N<sub>2</sub> isotherms and (B) pore size distribution for SBA-15 samples synthesized at different temperatures (100-180 °C).

Figure 2S *t*-plot curves of SBA-15<sub>160</sub> and SBA-15<sub>180</sub> samples.

Figure 3S (A) N<sub>2</sub> isotherms and (B) pore size distribution for MCM-41 samples synthesized at different temperatures (100-160 °C).

Figure 4S <sup>29</sup>Si NMR spectra of as-made (A) SBA-15<sub>100</sub> and (B) SBA-15<sub>180</sub> samples.

Figure 5S <sup>1</sup>H NMR spectra and assignments for triblock polymer P123 in acidic aqueous solution.

Figure 6S Small angle XRD patterns for SBA-15<sub>200</sub> and MCM-41<sub>180</sub> samples.

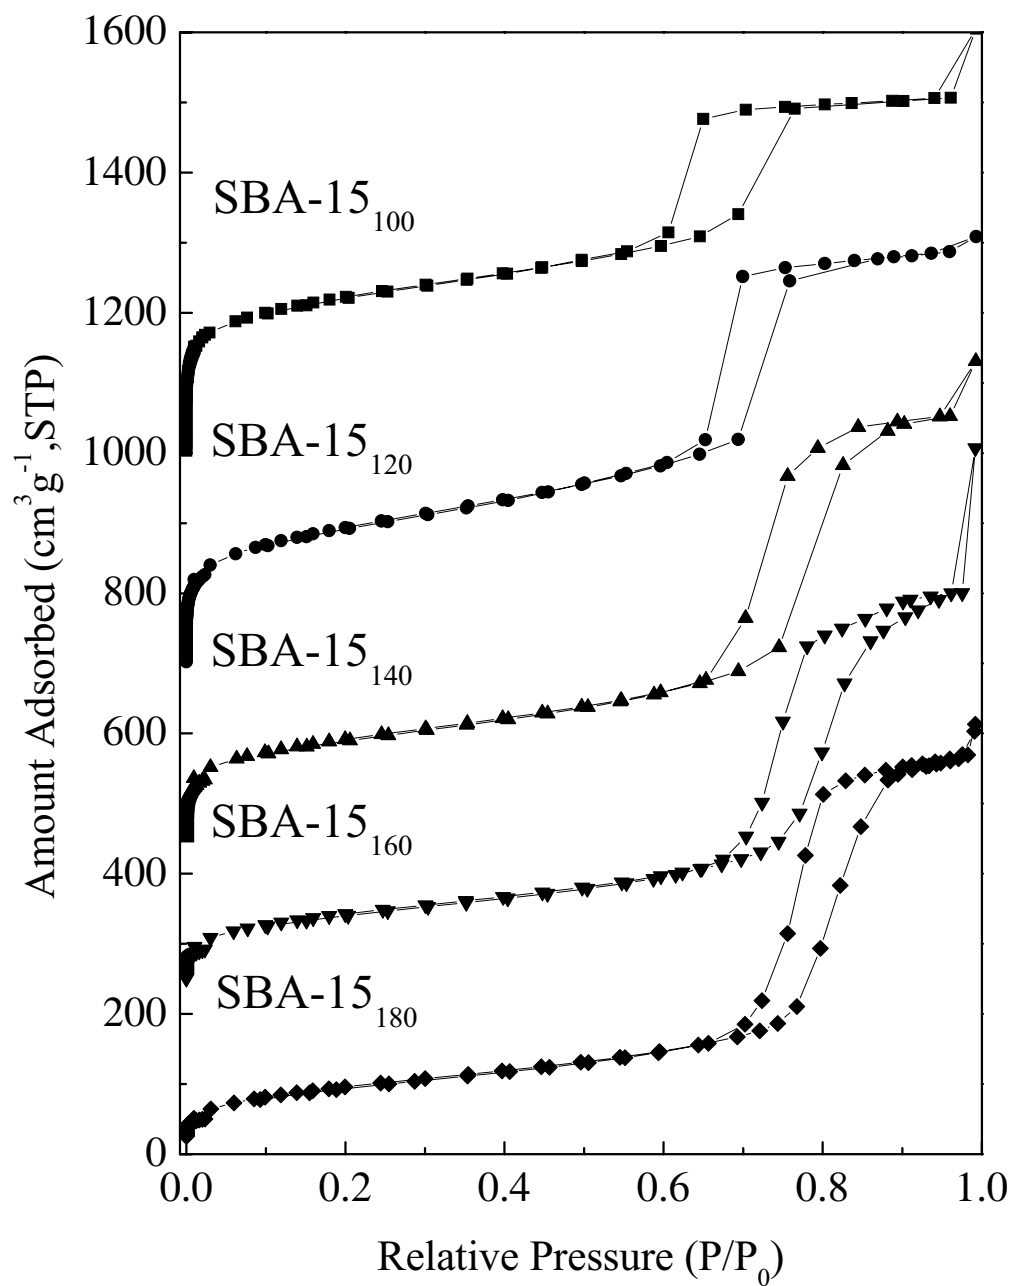

Figure 1SA

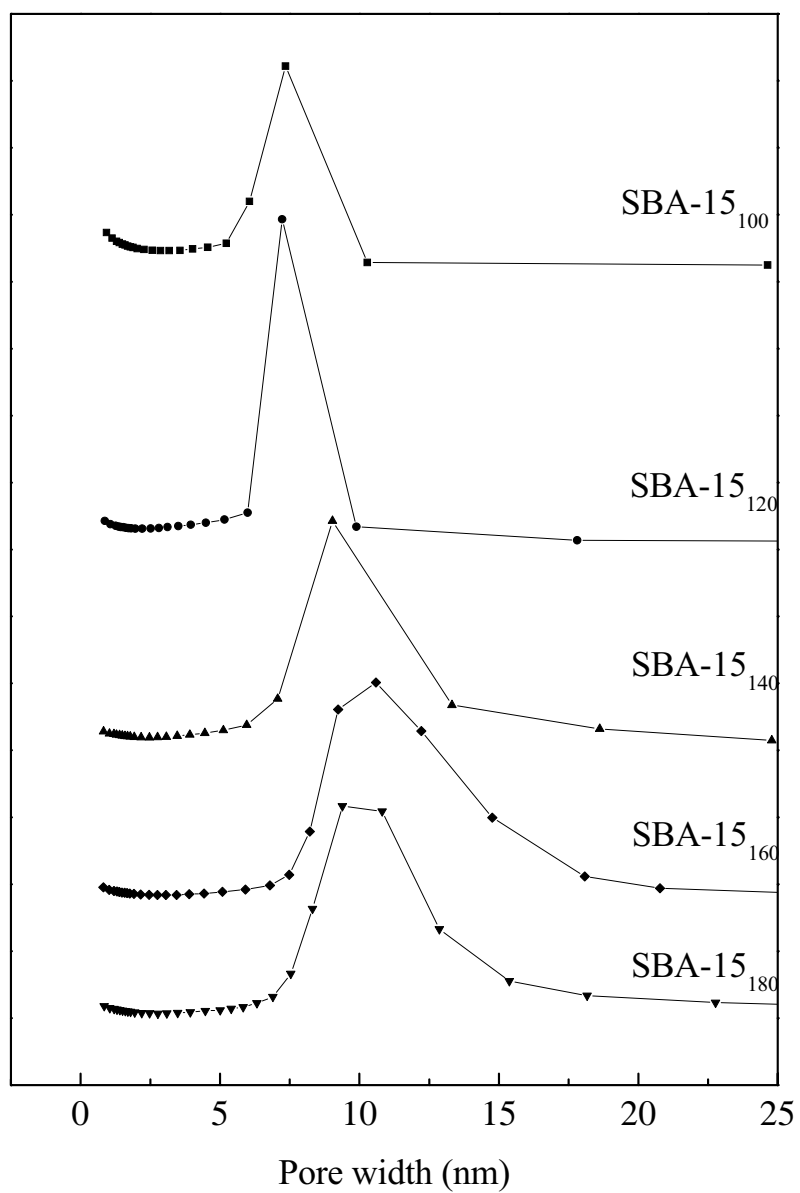

Figure 1SB

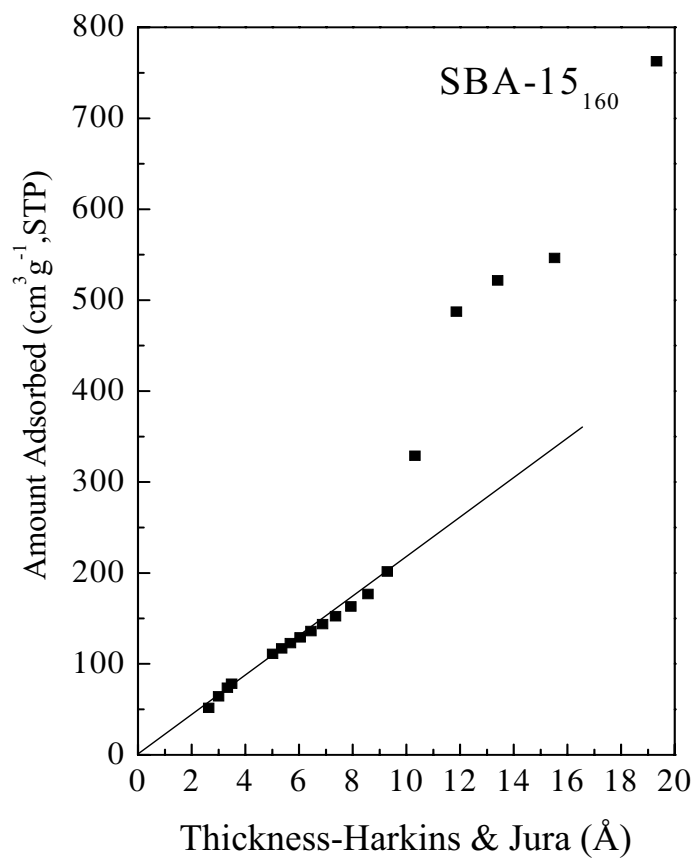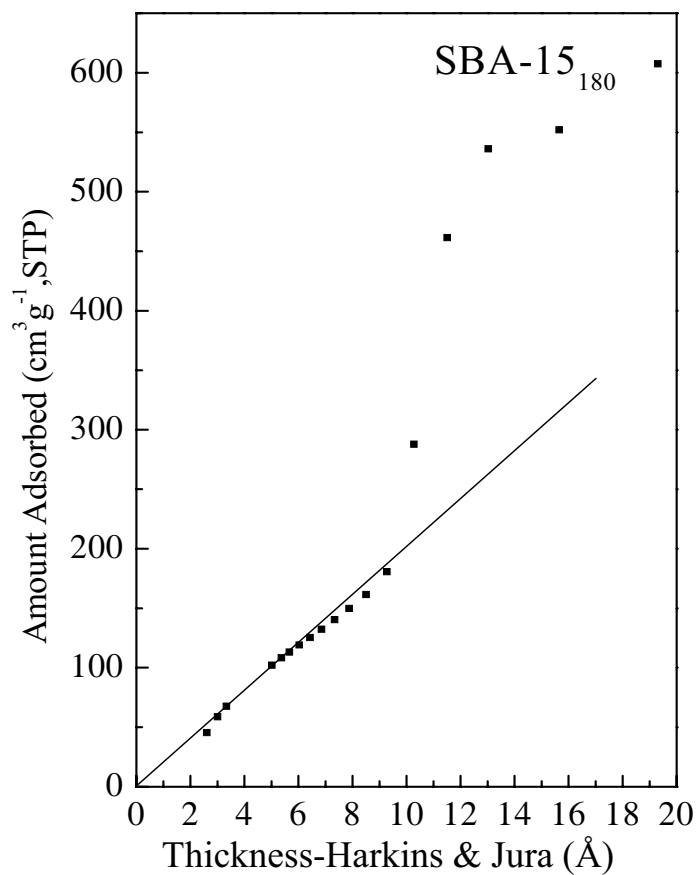

Figure 2S

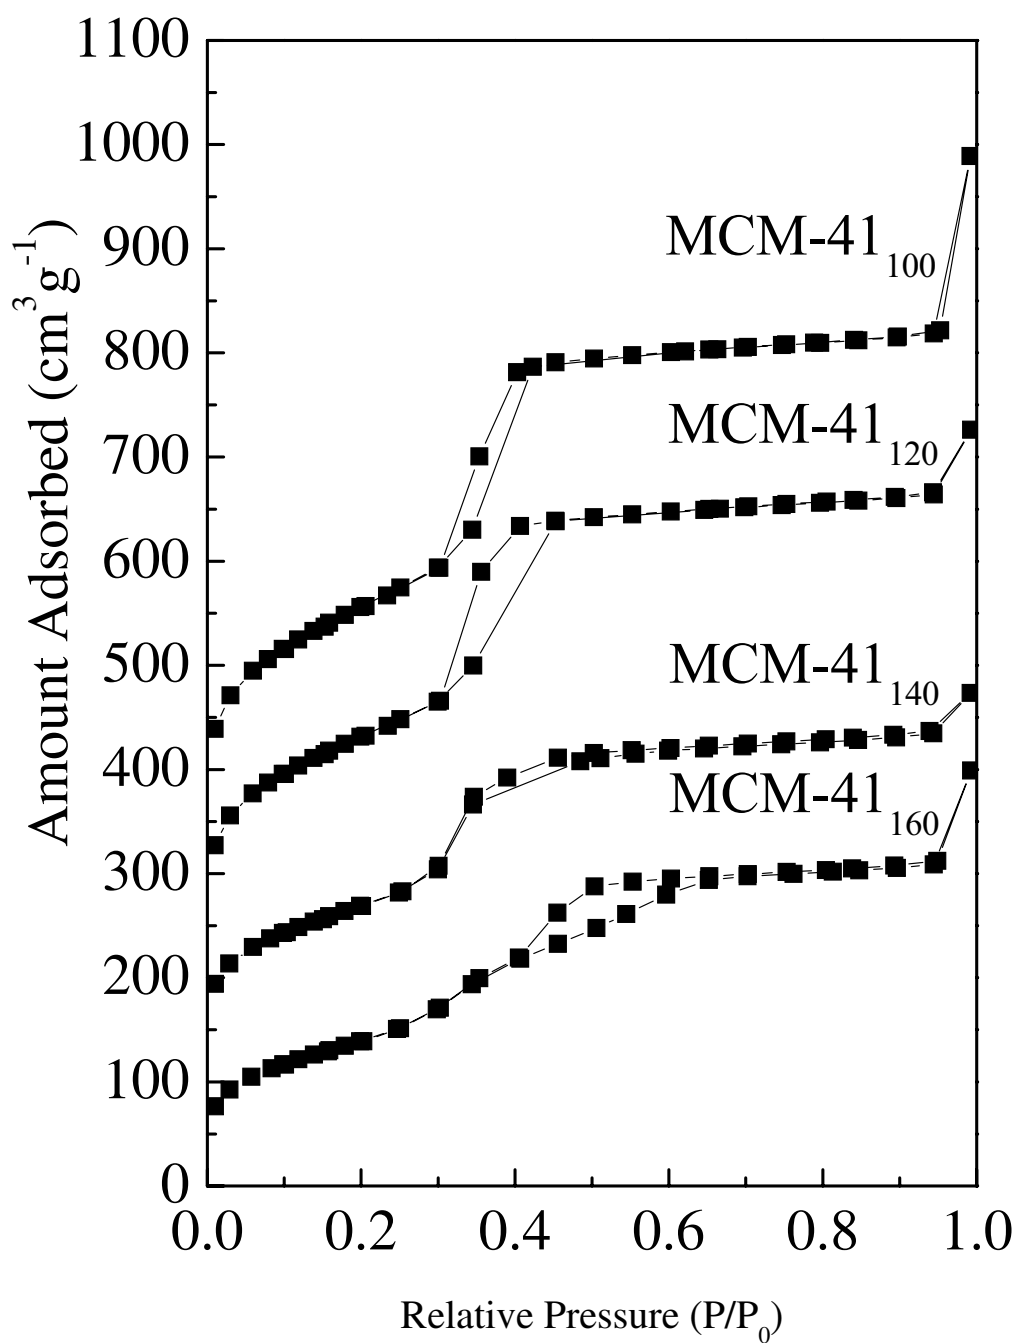

Figure 3SA

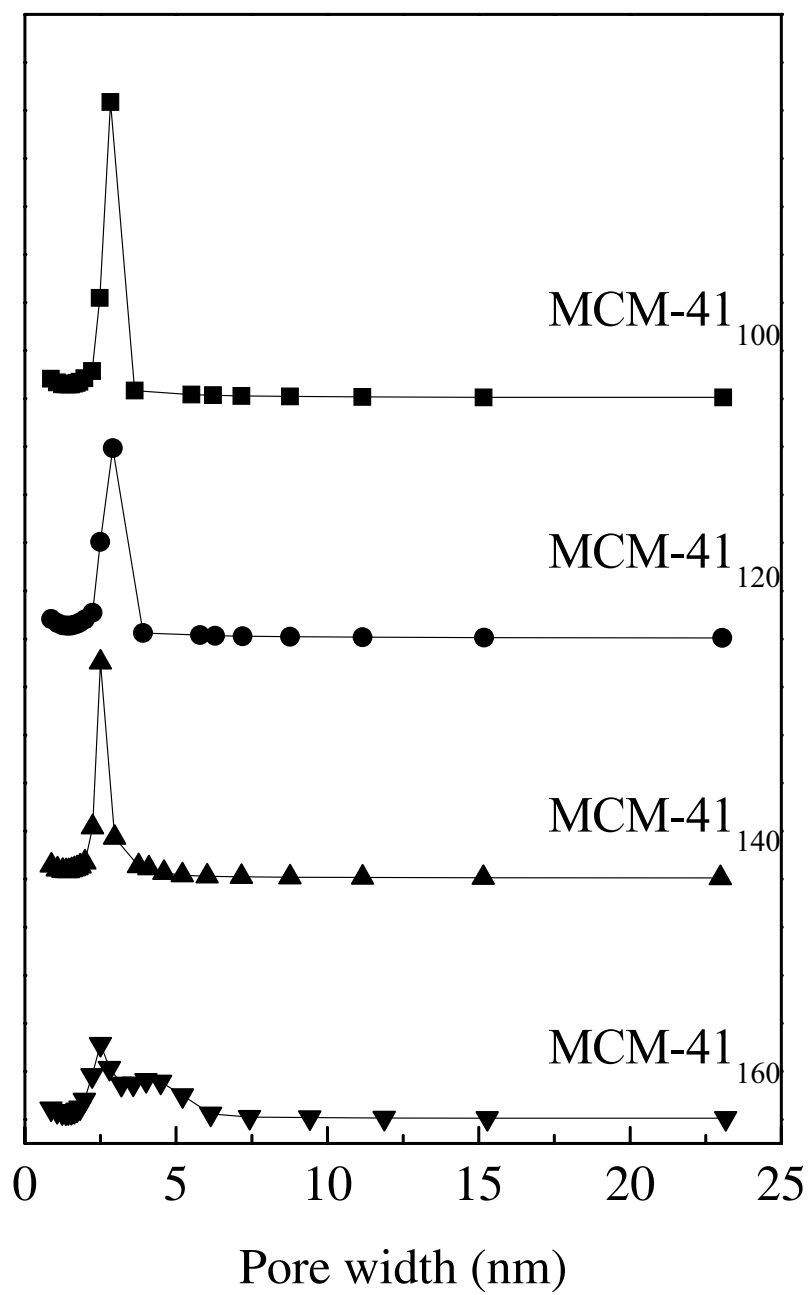

Figure 3SB

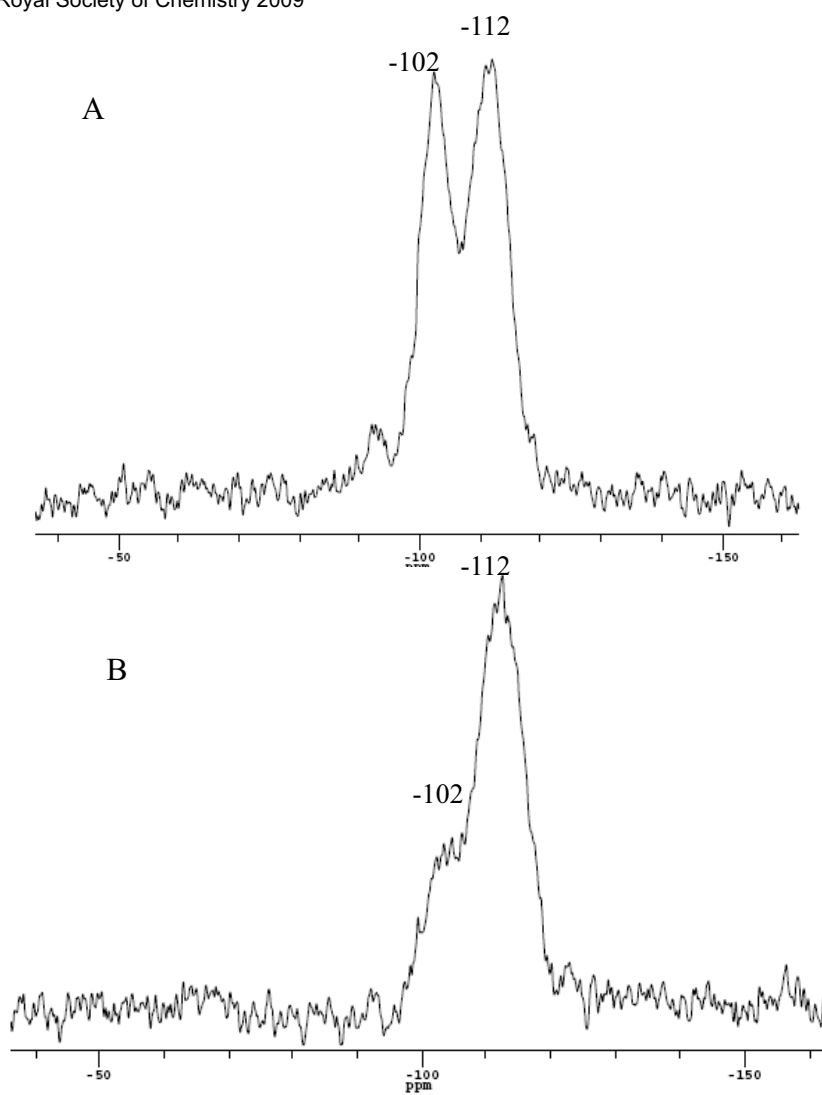

Figure 4S

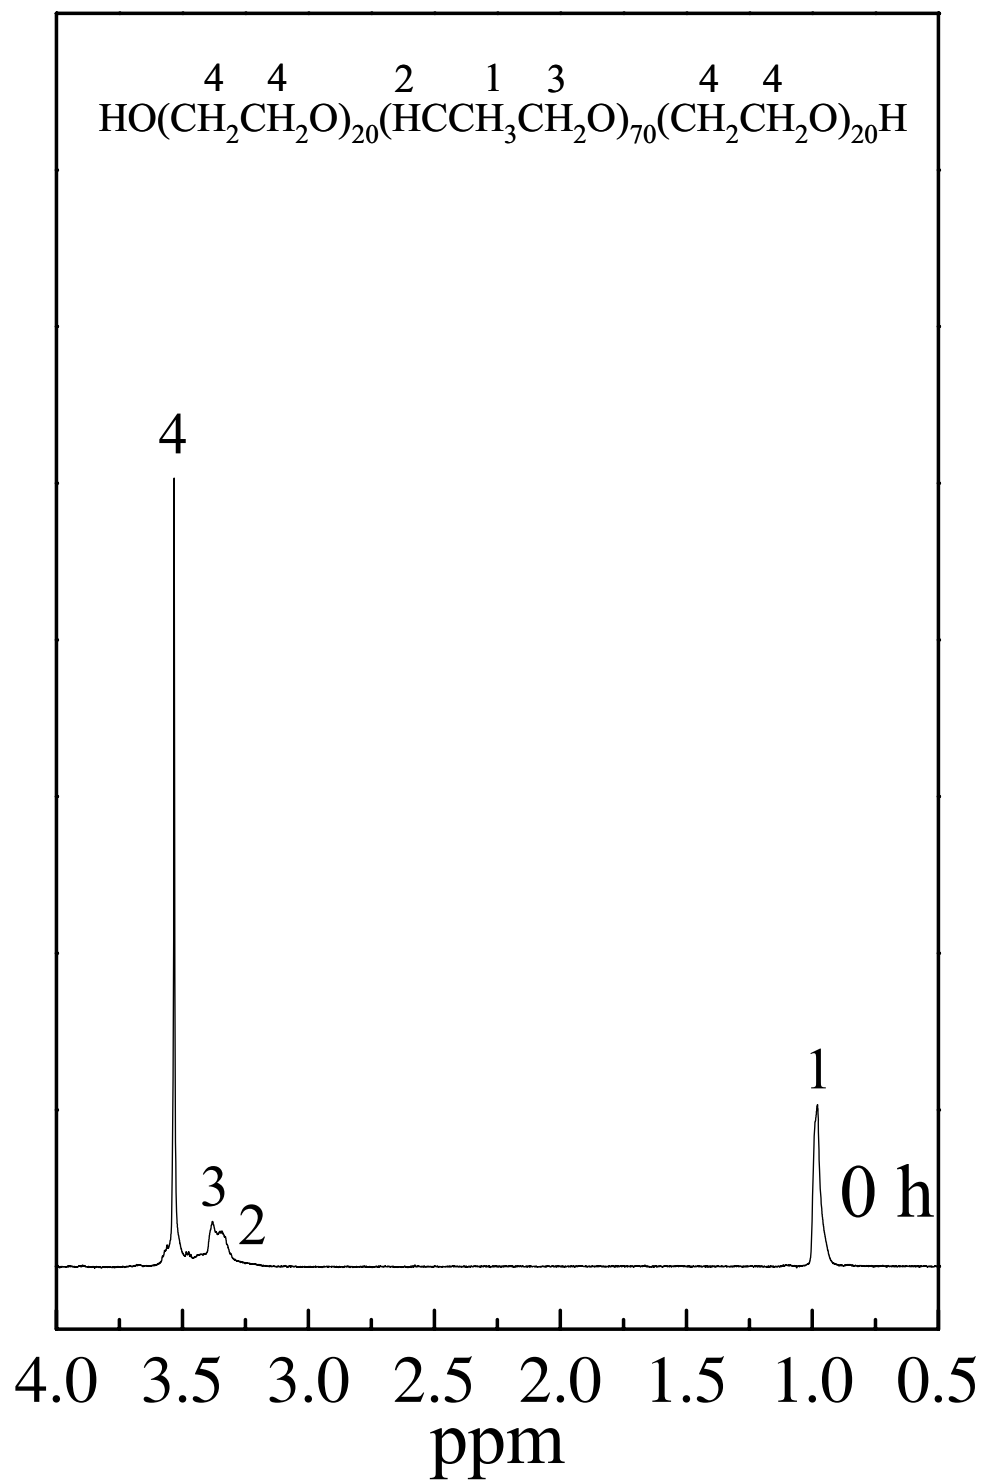

Figure 5S



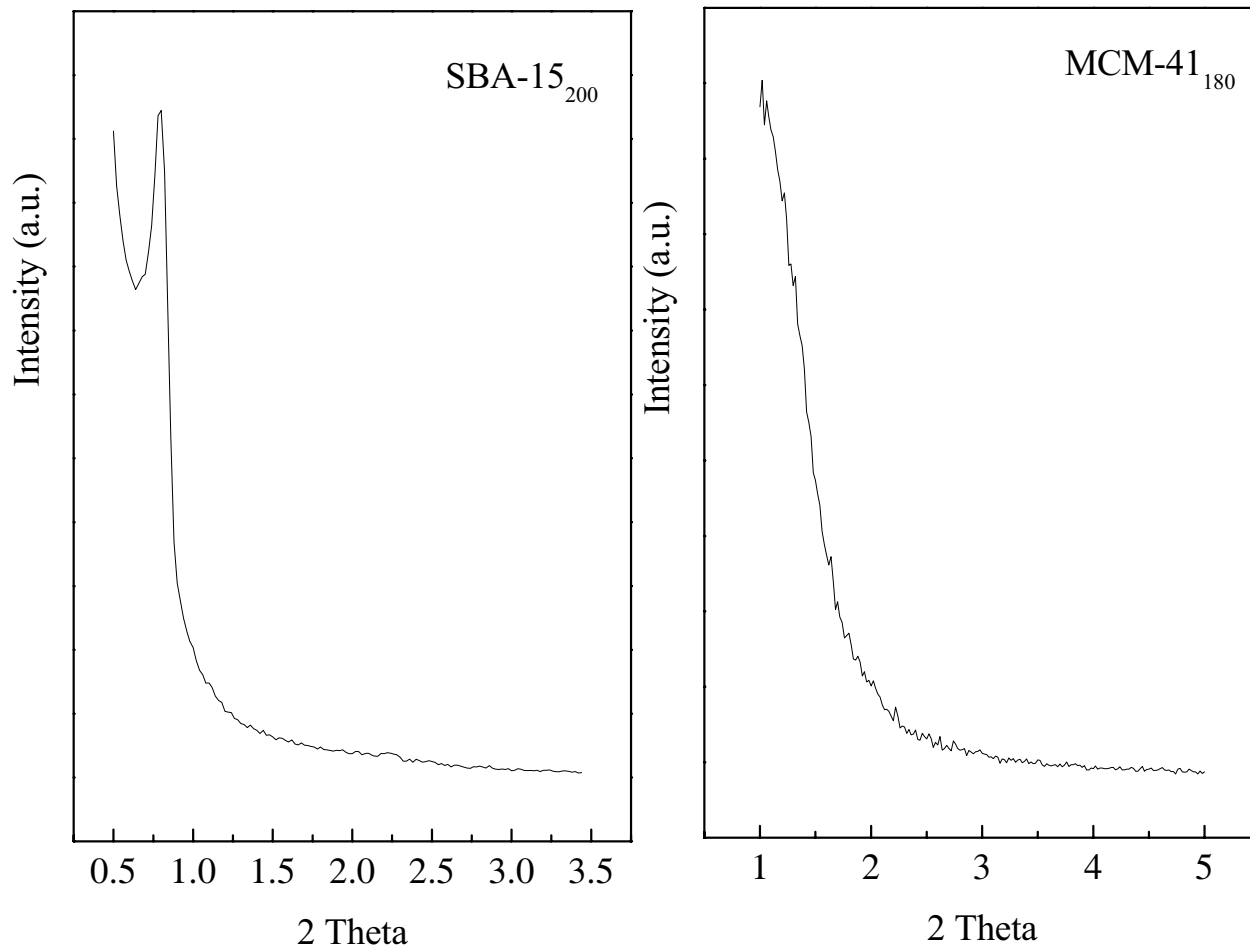

Figure 6S
